# Supplementary material
Source: PubMed Central journal article supplement (PMC7444477)
Supplement: NIHMS1591971-supplement-Supplementary_material.pdf [file NIHMS1591971-supplement-Supplementary_material.pdf]

Supplemental file contents:

**Supplemental Table 1:** ICD-9 and ICD-10 codes definitions for comorbidities and outcomes.

**Supplemental Table 2:** Standardized differences between the two groups after propensity score matching.

**Supplemental Table 3:** Trend in IVUS utilization over the study years.

**Supplemental Table 4:** Full model for the outcome of mortality

**Supplemental Table 5:** Full model for the outcome of myocardial infarction

**Supplemental Table 6:** Full model for the outcome of repeat revascularization

**Supplemental Figure:** Kaplan Meier curves for the study outcomes A) all-cause mortality, B) myocardial infarction, C) repeat revascularization between PCI with and without intravascular ultrasound in patients presenting with stable coronary artery disease.

**Supplemental table 1: ICD codes for comorbidities and outcomes**

|                         | ICD-9 code                                                                                                                                                                                                                                                   | ICD-10 code                                                                                                                                                                                                                                                                                                            |
|-------------------------|--------------------------------------------------------------------------------------------------------------------------------------------------------------------------------------------------------------------------------------------------------------|------------------------------------------------------------------------------------------------------------------------------------------------------------------------------------------------------------------------------------------------------------------------------------------------------------------------|
| Chronic kidney disease  | 5853, 5854                                                                                                                                                                                                                                                   | N183, N184                                                                                                                                                                                                                                                                                                             |
| End-stage renal disease | 5855, 5856, V4511                                                                                                                                                                                                                                            | N185, N186, Z992                                                                                                                                                                                                                                                                                                       |
| Acute Kidney injury     | 5845, 5846, 5847,<br>584, 5848, 5849                                                                                                                                                                                                                         | N17, N170, N171, N172, N178, N179,<br>N990                                                                                                                                                                                                                                                                             |
| Atrial fibrillation     | 42731                                                                                                                                                                                                                                                        | I480*, I481*, I482*, I489*                                                                                                                                                                                                                                                                                             |
| Underweight             | 78322                                                                                                                                                                                                                                                        | V850, Z681, R636                                                                                                                                                                                                                                                                                                       |
| Obesity                 | 2780, 27800, 7802,<br>27803, 27801                                                                                                                                                                                                                           | E668, E669, E661, E6609<br>E663, E669, V853, V853, V8531,<br>V8532, V8533, V8534, V8535,<br>V8536, V8537, V8538, V8539, Z683,<br>Z6831, Z683, Z6833, Z6834, Z6835,<br>Z6836, Z6837, Z6838, Z6839, E662,<br>E6601, V854, V8541, V8542, V8543,<br>V8544, V8545, Z684, Z6841, Z6842,<br>Z6843, Z6844, Z6845               |
| Cardiogenic shock       | 78551, 78550                                                                                                                                                                                                                                                 | R570                                                                                                                                                                                                                                                                                                                   |
| Cardiac arrest          | 4274, 4275, 42741,<br>42742                                                                                                                                                                                                                                  | I462, I46, I468, I469, I4901, I49,<br>I4902, I9712, I97120, I97121                                                                                                                                                                                                                                                     |
| Blood transfusion       | 9901, 9902, 9903,<br>9904, 9905, 9906,<br>9907, 9908, 9909                                                                                                                                                                                                   | 30243N0, 30243N1, 30243P0,<br>30243P1,<br>30243H0, 30243H1, 30240N0,<br>30240N1, 30240P0, 30240P1,<br>30240H0, 30240H1, 30230H0,<br>30230H1, 30230N0,<br>30230N1, 30230P0, 30230P1,<br>30233N0, 30233N1, 30233P0,<br>30233P1                                                                                           |
| Sleep apnea             | 78057, 32723                                                                                                                                                                                                                                                 | G4730, G4733                                                                                                                                                                                                                                                                                                           |
| Heart failure           | 39891, 40201, 40211,<br>40291, 40401, 40411,<br>40491, 4280-4289                                                                                                                                                                                             | I5020, I5021, I5022, I5023, I5030,<br>I5031, I5032, I5033, I5040, I5041,<br>I5042, I5043                                                                                                                                                                                                                               |
| Bleeding                | 4552, 4555, 4558,<br>4560, 45620, 5307,<br>53082, 5310-5316,<br>5320-5326, 5330-<br>5336, 5340-5346,<br>53501-53561, 56202-<br>56203, 56212-56213,<br>5693, 56985, 5780,<br>5781, 5789,<br>53783, 56881, 430*,<br>431*, 432*, 59970,<br>59971, 59972, 71911, | R310*, R311*, R312*, R319*,<br>M25019,<br>R040*, R041*, R042*, R0481, R0489,<br>R049,<br>I312*, R58*<br>S064X0A, S064X1A, S064X2A,<br>S064X3A, S064X4A, S064X5A,<br>S064X6A, S064X7A, S064X8A,<br>S064X9A, S065X0A, S065X1A,<br>S065X2A, S065X3A, S065X4A,<br>S065X5A, S065X6A, S065X7A,<br>S065X8A, S065X9A, S066X0A, |

|                                                |                                                                                                                |                                                                                                                                                                                                                                                                                                                                                                                                                                                                                                                                                                                                                                                               |
|------------------------------------------------|----------------------------------------------------------------------------------------------------------------|---------------------------------------------------------------------------------------------------------------------------------------------------------------------------------------------------------------------------------------------------------------------------------------------------------------------------------------------------------------------------------------------------------------------------------------------------------------------------------------------------------------------------------------------------------------------------------------------------------------------------------------------------------------|
|                                                | 7847*, 7848x, 7863*,<br>4230*, 4590*,<br>852*, 853*                                                            | S066X1A, S066X2A, S066X3A,<br>S066X4A, S066X5A, S066X6A,<br>S066X7A, S066X8A, S066X9A.                                                                                                                                                                                                                                                                                                                                                                                                                                                                                                                                                                        |
| Ischemic stroke                                | 433*, 434*, 436*,<br>4371, 4378, 4379                                                                          | I63, I65, I66, I6781, I6782, I6789,<br>I679                                                                                                                                                                                                                                                                                                                                                                                                                                                                                                                                                                                                                   |
| Anterior ST-elevation<br>myocardial infarction | 4100, 41000, 41001,<br>4101, 41010, 41011                                                                      | I210, I2101, I2102, I2109                                                                                                                                                                                                                                                                                                                                                                                                                                                                                                                                                                                                                                     |
| Inferior ST-elevation<br>myocardial infarction | 4102, 41020, 41021,<br>4103, 41030, 41031,<br>4104, 41040, 41041,<br>4105, 41050, 41051,<br>4106, 41060, 41061 | I211, I2111, I2119, I2121, I212,<br>I2129, I213,                                                                                                                                                                                                                                                                                                                                                                                                                                                                                                                                                                                                              |
| Non ST-elevation<br>myocardial infarction      | 4107, 41070, 41071                                                                                             | I214                                                                                                                                                                                                                                                                                                                                                                                                                                                                                                                                                                                                                                                          |
| Unstable angina                                | 4111                                                                                                           | I200                                                                                                                                                                                                                                                                                                                                                                                                                                                                                                                                                                                                                                                          |
| Drug eluting stent                             | 3607                                                                                                           | 0270346, 027034Z, 0270356,<br>027035Z, 0270366, 027036Z,<br>0270376, 027037Z, 0271346,<br>027134Z, 0271356, 027135Z,<br>0271366, 027136Z, 0271376,<br>027137Z, 0272346, 027234Z,<br>0272356, 027235Z, 0272366,<br>027236Z, 0272376, 027237Z,<br>0273346, 027334Z, 0273356,<br>027335Z, 0273366, 027336Z,<br>0273376, 027337Z, 0270446,<br>027044Z, 0270456, 027045Z,<br>0270466, 027046Z, 0270476,<br>027047Z, 0271446, 027144Z,<br>0271456, 027145Z, 0271466,<br>027146Z, 0271476, 027147Z,<br>0272446, 027244Z, 0272456,<br>027245Z, 0272466, 027246Z,<br>0272476, 027247Z, 0273446,<br>027344Z, 0273456, 027345Z,<br>0273466, 027346Z, 0273476,<br>027347Z |
| Bare metal stent                               | 3606                                                                                                           | 02703D6, 02703DZ, 02703E6,<br>02703EZ, 02703F6, 02703FZ,<br>02703G6, 02703GZ, 02713D6,<br>02713DZ, 02713E6, 02713EZ,<br>02713F6, 02713FZ, 02713G6,<br>02713GZ, 02723D6, 02723DZ,<br>02723E6, 02723EZ, 02723F6,<br>02723FZ, 02723G6, 02723GZ,                                                                                                                                                                                                                                                                                                                                                                                                                  |

|                                      |      |                                                                                                                                                                                                                                                                                                                                                                          |
|--------------------------------------|------|--------------------------------------------------------------------------------------------------------------------------------------------------------------------------------------------------------------------------------------------------------------------------------------------------------------------------------------------------------------------------|
|                                      |      | 02733D6, 02733DZ, 02733E6, 02733EZ, 02733F6, 02733FZ, 02733G6, 02733GZ, 02704D6, 02704DZ, 02704E6, 02704EZ, 02704F6, 02704FZ, 02704G6, 02704GZ, 02714D6, 02714DZ, 02714E6', 02714EZ, 02714F6, 02714FZ, 02714G6, 02714GZ, 02724D6, 02724DZ, 02724E6, 02724EZ, 02724F6', 02724FZ, 02724G6, 02724GZ, 02734D6, 02734DZ, 02734E6, 02734EZ, 02734F6, 02734FZ, 02734G6, 02734GZ |
| Bifurcation                          | 0044 | 0270346, 0270356, 0270366, 0270376, 02703D6, 02703E6, 02703F6, 02703G6, 02703T6, 02703Z6, 0270446, 0270456, 0270466, 0270476, 02704D6, 02704E6, 02704F6, 02704G6, 02704T6, 02704Z6                                                                                                                                                                                       |
| Intravascular ultrasound             | 0024 | B241YZZ, B241ZZ3, B241ZZZ, B240YZZ, B240ZZ3, B240ZZZ                                                                                                                                                                                                                                                                                                                     |
| Chronic total occlusion              | 4142 | I2582                                                                                                                                                                                                                                                                                                                                                                    |
| Intervention on one coronary vessel  | 0040 | 0270346, 027034Z, 02703D6, 02703DZ, 0270446, 027044Z, 02704D6, 02704DZ, 0270356, 027035Z, 02703E6, 02703EZ, 0270456, 027045Z, 02704E6, 02704EZ, 0270366, 027036Z, 02703F6, 02703FZ, 0270466, 027046Z, 02704F6, 02704FZ, 0270376, 027037Z, 02703G6, 02703GZ, 0270476, 027047Z, 02704G6, 02704GZ                                                                           |
| Intervention on two coronary vessels | 0041 | 0271346, 027134Z, 02713D6, 02713DZ, 0271446, 027144Z, 02714D6, 02714DZ, 0271356, 027135Z, 02713E6, 02713EZ, 0271456, 027145Z, 02714E6, 02714EZ, 0271366, 027136Z, 02713F6, 02713FZ, 0271466, 027146Z, 02714F6, 02714FZ, 0271376, 027137Z, 02713G6, 02713GZ, 0271476, 027147Z, 02714G6, 02714GZ                                                                           |

|                                               |      |                                                                                                                                                                                                                                                                                                |
|-----------------------------------------------|------|------------------------------------------------------------------------------------------------------------------------------------------------------------------------------------------------------------------------------------------------------------------------------------------------|
| Intervention on three coronary vessels        | 0042 | 0272346, 027234Z, 02723D6, 02723DZ, 0272446, 027244Z, 02724D6, 02724DZ, 0272356, 027235Z, 02723E6, 02723EZ, 0272456, 027245Z, 02724E6, 02724EZ, 0272366, 027236Z, 02723F6, 02723FZ, 0272466, 027246Z, 02724F6, 02724FZ, 0272376, 027237Z, 02723G6, 02723GZ, 0272476, 027247Z, 02724G6, 02724GZ |
| Intervention on four or more coronary vessels | 0043 | 0273346, 027334Z, 02733D6, 02733DZ, 0273446, 027344Z, 02734D6, 02734DZ, 0273356, 027335Z, 02733E6, 02733EZ, 0273456, 027345Z, 02734E6, 02734EZ, 0273366, 027336Z, 02733F6, 02733FZ, 0273466, 027346Z, 02734F6, 02734FZ, 0273376, 027337Z, 02733G6, 02733GZ, 0273476, 027347Z, 02734G6, 02734GZ |
| One stent placed                              | 0045 | 0270346, 027034Z, 02703D6, 02703DZ, 0270446, 027044Z, 02704D6, 02704DZ, 0271346, 027134Z, 02713D6, 02713DZ, 0271446, 027144Z, 02714D6, 02714DZ, 0272346, 027234Z, 02723D6, 02723DZ, 0272446, 027244Z, 02724D6, 02724DZ, 0273346, 027334Z, 02733D6, 02733DZ, 0273446, 027344Z, 02734D6, 02734DZ |
| Two stents placed                             | 0046 | 0270356, 027035Z, 02703E6, 02703EZ, 0270456, 027045Z, 02704E6, 02704EZ, 0271356, 027135Z, 02713E6, 02713EZ, 0271456, 027145Z, 02714E6, 02714EZ, 0272356, 027235Z, 02723E6, 02723EZ, 0272456, 027245Z, 02724E6, 02724EZ, 0273356, 027335Z, 02733E6, 02733EZ, 0273456, 027345Z, 02734E6, 02734EZ |
| Three stents placed                           | 0047 | 0270366, 027036Z, 02703F6, 02703FZ, 0270466, 027046Z,                                                                                                                                                                                                                                          |

|                               |      |                                                                                                                                                                                                                                                                                                                              |
|-------------------------------|------|------------------------------------------------------------------------------------------------------------------------------------------------------------------------------------------------------------------------------------------------------------------------------------------------------------------------------|
|                               |      | 02704F6, 02704FZ, 0271366,<br>027136Z, 02713F6, 02713FZ,<br>0271466, 027146Z, 02714F6,<br>02714FZ, 0272366, 027236Z,<br>02723F6, 02723FZ, 0272466,<br>027246Z, 02724F6, 02724FZ,<br>0273366, 027336Z, 02733F6,<br>02733FZ, 0273466, 027346Z,<br>02734F6, 02734FZ                                                             |
| Four or more stents<br>placed | 0048 | 0270376, 027037Z, 02703G6,<br>02703GZ, 0270476, 027047Z,<br>02704G6, 02704GZ, 0271376,<br>027137Z, 02713G6, 02713GZ,<br>0271476, 027147Z, 02714G6,<br>02714GZ, 0272376, 027237Z,<br>02723G6, 02723GZ, 0272476,<br>027247Z, 02724G6, 02724GZ,<br>0273376, 027337Z, 02733G6,<br>02733GZ, 0273476, 027347Z,<br>02734G6, 02734GZ |

**Supplemental Table 2:** Standardized difference between the two groups after propensity score matching\*

|                             | IVUS<br>N=103,558 | No IVUS<br>N=103,558 | Mean<br>difference | Standardized<br>difference |
|-----------------------------|-------------------|----------------------|--------------------|----------------------------|
| Age                         | 73.06 (9.24)      | 73.01 (9.41)         | 0.05               | 0.01                       |
| Race                        | 1.21 (0.54)       | 1.21 (0.54)          | 0                  | 0                          |
| Sex                         | 0.60 (0.49)       | 0.60 (0.49)          | 0                  | 0                          |
| AIDS                        | 0.00 (0.04)       | 0.00 (0.04)          | 0                  | 0                          |
| Alcohol abuse               | 0.01 (0.11)       | 0.01 (0.11)          | 0                  | 0                          |
| Deficiency Anemias          | 0.16 (0.37)       | 0.16 (0.37)          | 0                  | 0                          |
| Connective tissue disease   | 0.03 (0.18)       | 0.03 (0.18)          | 0                  | 0                          |
| Congestive heart failure    | 0.29 (0.45)       | 0.29 (0.45)          | 0                  | 0                          |
| Chronic pulmonary disease   | 0.23 (0.42)       | 0.23 (0.42)          | 0                  | 0                          |
| Coagulopathy                | 0.05 (0.21)       | 0.05 (0.21)          | 0                  | 0                          |
| Depression                  | 0.09 (0.28)       | 0.08 (0.28)          | 0                  | 0.01                       |
| Diabetes mellitus           | 0.39 (0.49)       | 0.38 (0.49)          | 0                  | 0                          |
| Drug abuse                  | 0.01 (0.09)       | 0.01 (0.09)          | 0                  | 0                          |
| Hypertension                | 0.83 (0.38)       | 0.83 (0.38)          | 0                  | 0                          |
| Hypothyroidism              | 0.14 (0.35)       | 0.14 (0.35)          | 0                  | 0                          |
| Liver disease               | 0.02 (0.13)       | 0.02 (0.13)          | 0                  | 0                          |
| Lymphoma                    | 0.01 (0.08)       | 0.01 (0.08)          | 0                  | 0                          |
| Electrolyte disorders       | 0.19 (0.39)       | 0.18 (0.39)          | 0                  | 0.01                       |
| Metastatic cancer           | 0.01 (0.08)       | 0.01 (0.08)          | 0                  | 0                          |
| Obesity                     | 0.15 (0.36)       | 0.15 (0.36)          | 0                  | 0                          |
| Peripheral arterial disease | 0.16 (0.37)       | 0.17 (0.37)          | 0                  | 0                          |
| Psychoses                   | 0.02 (0.14)       | 0.02 (0.14)          | 0                  | 0                          |
| Pulmonary hypertension      | 0.05 (0.21)       | 0.05 (0.21)          | 0                  | 0                          |
| Renal failure               | 0.21 (0.41)       | 0.21 (0.41)          | 0                  | 0                          |
| Tumor without metastasis    | 0.02 (0.13)       | 0.02 (0.13)          | 0                  | 0                          |
| Peptic ulcer Disease        | 0.00 (0.07)       | 0.00 (0.07)          | 0                  | 0                          |
| Underweight                 | 0.02 (0.15)       | 0.02 (0.15)          | 0                  | 0                          |
| Prior bleeding              | 0.05 (0.23)       | 0.05 (0.23)          | 0                  | 0                          |
| Prior cerebral hemorrhage   | 0.00 (0.04)       | 0.00 (0.04)          | 0                  | 0                          |
| Prior GI bleeding           | 0.03 (0.16)       | 0.03 (0.16)          | 0                  | 0                          |
| Prior ICD                   | 0.02 (0.15)       | 0.02 (0.15)          | 0                  | 0                          |
| Prior ischemic stroke       | 0.05 (0.22)       | 0.05 (0.22)          | 0                  | 0                          |
| Prior pacemaker             | 0.04 (0.19)       | 0.04 (0.19)          | 0                  | 0                          |
| Sleep apnea                 | 0.10 (0.29)       | 0.10 (0.29)          | 0                  | 0                          |
| Prior Smoking               | 0.26 (0.44)       | 0.26 (0.44)          | 0                  | 0                          |
| Preexisting AF              | 0.17 (0.38)       | 0.17 (0.37)          | 0                  | 0                          |
| Cardiac arrest              | 0.04 (0.19)       | 0.04 (0.19)          | 0                  | 0                          |
| Cardiogenic shock           | 0.05 (0.21)       | 0.05 (0.21)          | 0                  | 0                          |
| Drug eluting stent          | 0.84 (0.36)       | 0.84 (0.36)          | 0                  | 0                          |
| Bare metal stent            | 0.17 (0.38)       | 0.17 (0.38)          | 0                  | 0                          |
| Number of vessels           | 1.34 (0.62)       | 1.33 (0.61)          | 0                  | 0.01                       |

|                               |             |             |      |      |
|-------------------------------|-------------|-------------|------|------|
| Number of stents              | 1.58 (0.85) | 1.58 (0.85) | 0.01 | 0.01 |
| Chronic total occlusion       | 0.10 (0.30) | 0.10 (0.30) | 0    | 0    |
| Bifurcation                   | 0.04 (0.20) | 0.04 (0.20) | 0    | 0    |
| Blood transfusion             |             |             |      |      |
| Prior coronary artery disease | 0.23 (0.42) | 0.23 (0.42) | 0    | 0    |
| Prior revascularization       | 0.20 (0.40) | 0.20 (0.40) | 0    | 0    |
| Anterior STEMI                | 0.07 (0.26) | 0.07 (0.25) | 0    | 0    |
| Inferior STEMI                | 0.09 (0.29) | 0.09 (0.28) | 0    | 0.01 |
| NSTEMI                        | 0.34 (0.47) | 0.34 (0.47) | 0    | 0    |
| Stable CAD                    | 0.35 (0.48) | 0.35 (0.48) | 0    | 0.01 |
| Unstable angina               | 0.16 (0.37) | 0.17 (0.37) | 0    | 0    |

\*Values are presented as mean (Standard deviation).

CAD=Coronary artery disease, STEMI=ST-elevation myocardial infarction,

AIDS=Acquired immunodeficiency syndrome.



**Supplemental Table 3:** Trend in IVUS utilization over the study years.

| <b>Year</b>                    | <b>2009</b> | <b>2010</b> | <b>2011</b> | <b>2012</b> | <b>2013</b> | <b>2014</b> | <b>2015</b> | <b>2016</b> | <b>2017</b> |
|--------------------------------|-------------|-------------|-------------|-------------|-------------|-------------|-------------|-------------|-------------|
| IVUS                           | 7,786       | 9,166       | 13,844      | 14,262      | 12,382      | 10,803      | 11,250      | 12,157      | 14,137      |
| Total PCI procedures           | 260,874     | 241,360     | 217,981     | 204,038     | 188,677     | 181,188     | 185,034     | 193,775     | 204,250     |
| Percentage of IVUS utilization | 3.0%        | 3.8%        | 6.4%        | 7.0%        | 6.6%        | 6.0%        | 6.1%        | 6.3%        | 6.9%        |

**Supplemental Table 4: Full model for the outcome of mortality**

|                                        | <b>Hazard ratio</b> | <b>95% CI</b> | <b>P Value</b> |
|----------------------------------------|---------------------|---------------|----------------|
| <b>Intravascular ultrasound</b>        | 0.903               | 0.885-0.922   | <0.0001        |
| <b>Age</b>                             | 1.04                | 1.03-1.04     | <0.0001        |
| <b>Black race</b>                      | 1.10                | 1.07-1.12     | <0.0001        |
| <b>Other races</b>                     | 0.92                | 0.89-0.96     | <0.0001        |
| <b>Female sex</b>                      | 0.98                | 0.96-0.99     | 0.0002         |
| <b>AIDS</b>                            | 1.54                | 1.29-1.83     | <0.0001        |
| <b>Alcohol abuse</b>                   | 1.10                | 1.03-1.16     | 0.002          |
| <b>Anemia</b>                          | 1.24                | 1.22-1.26     | <0.0001        |
| <b>Connective tissue disease</b>       | 1.17                | 1.13-1.21     | <0.0001        |
| <b>Congestive heart failure</b>        | 1.72                | 1.7-1.75      | <0.0001        |
| <b>Chronic lung disease</b>            | 1.53                | 1.51-1.55     | <0.0001        |
| <b>Coagulopathy</b>                    | 1.13                | 1.09-1.16     | <0.0001        |
| <b>Depression</b>                      | 1.11                | 1.09-1.14     | <0.0001        |
| <b>Diabetes mellitus</b>               | 1.29                | 1.28-1.31     | <0.0001        |
| <b>Drug abuse</b>                      | 1.14                | 1.05-1.23     | 0.0021         |
| <b>Hypertension</b>                    | 0.85                | 0.84-0.87     | <0.0001        |
| <b>Hypothyroidism</b>                  | 0.95                | 0.93-0.96     | <0.0001        |
| <b>Liver disease</b>                   | 1.39                | 1.33-1.47     | <0.0001        |
| <b>Lymphoma</b>                        | 1.64                | 1.55-1.74     | <0.0001        |
| <b>Electrolytes abnormality</b>        | 1.32                | 1.3-1.35      | <0.0001        |
| <b>Metastasis</b>                      | 3.77                | 3.54-4.02     | <0.0001        |
| <b>Obesity</b>                         | 0.87                | 0.85-0.89     | <0.0001        |
| <b>Peripheral arterial disease</b>     | 1.32                | 1.3-1.34      | <0.0001        |
| <b>Psychosis</b>                       | 1.29                | 1.23-1.35     | <0.0001        |
| <b>Pulmonary hypertension</b>          | 1.27                | 1.23-1.3      | <0.0001        |
| <b>Chronic kidney disease</b>          | 1.75                | 1.73-1.78     | <0.0001        |
| <b>Tumor without metastasis</b>        | 1.68                | 1.6-1.76      | <0.0001        |
| <b>Weight loss</b>                     | 1.47                | 1.41-1.52     | <0.0001        |
| <b>Prior bleeding</b>                  | 1.08                | 1.03-1.12     | 0.0003         |
| <b>Prior cerebral hemorrhage</b>       | 2.52                | 2.1-3.02      | <0.0001        |
| <b>Prior GI bleed</b>                  | 1.14                | 1.08-1.2      | <0.0001        |
| <b>Prior ICD</b>                       | 1.41                | 1.37-1.46     | <0.0001        |
| <b>Prior ischemic stroke</b>           | 1.17                | 1.14-1.2      | <0.0001        |
| <b>Prior pacemaker</b>                 | 1.13                | 1.1-1.16      | <0.0001        |
| <b>Prior revascularization</b>         | 1.26                | 1.21-1.32     | <0.0001        |
| <b>Sleep apnea</b>                     | 0.90                | 0.88-0.92     | <0.0001        |
| <b>Smoking</b>                         | 0.98                | 0.97-1        | 0.0317         |
| <b>Preexisting atrial fibrillation</b> | 1.27                | 1.25-1.29     | <0.0001        |
| <b>Cardiac arrest</b>                  | 1.69                | 1.63-1.75     | <0.0001        |
| <b>Cardiogenic shock</b>               | 1.97                | 1.91-2.04     | <0.0001        |
| <b>Drug eluting stent</b>              | Reference           | Reference     |                |
| <b>Bare metal stent</b>                | 1.33                | 1.31-1.35     | <0.0001        |

|                                                |           |           |         |
|------------------------------------------------|-----------|-----------|---------|
| <b>Number of vessels (reference= 1 vessel)</b> |           |           |         |
| <b>2 Vessels</b>                               | 1.06      | 1.05-1.08 | <0.0001 |
| <b>3 Vessels</b>                               | 1.13      | 1.09-1.16 | <0.0001 |
| <b>≥4 Vessels</b>                              | 1.16      | 1.1-1.22  | <0.0001 |
| <b>Number of stents (reference= 1 stent)</b>   |           |           |         |
| <b>2 Stents</b>                                | 1.02      | 1.01-1.04 | 0.0045  |
| <b>3 Stents</b>                                | 1.06      | 1.04-1.08 | <0.0001 |
| <b>≥4 Stents</b>                               | 1.08      | 1.05-1.12 | <0.0001 |
| <b>Chronic total occlusion</b>                 | 1.07      | 1.05-1.09 | <0.0001 |
| <b>Bifurcational</b>                           | 0.94      | 0.91-0.98 | 0.0013  |
| <b>Stable CAD</b>                              | Reference | Reference |         |
| <b>Unstable angina</b>                         | 0.89      | 0.88-0.90 | <0.0001 |
| <b>Non-ST elevation MI</b>                     | 1.10      | 1.09-1.11 | <0.0001 |
| <b>Inferior ST-elevation MI</b>                | 1.04      | 1.03-1.05 | <0.0001 |
| <b>Anterior ST-elevation MI</b>                | 1.18      | 1.16-1.19 | <0.0001 |

**Supplemental Table 5: Full model for outcome of myocardial infarction**

|                                                | <b>Hazard ratio</b> | <b>95% CI</b> | <b>P value</b> |
|------------------------------------------------|---------------------|---------------|----------------|
| <b>Intravascular ultrasound</b>                | 0.899               | 0.893-0.904   | <0.0001        |
| <b>Age</b>                                     | 1.001               | 1.000-1.001   | <0.0001        |
| <b>Black race</b>                              | 1.16                | 1.15-1.17     | <0.0001        |
| <b>Female sex</b>                              | 1.08                | 1.07-1.09     | <0.0001        |
| <b>Anemia</b>                                  | 1.16                | 1.15-1.17     | <0.0001        |
| <b>Connective tissue disease</b>               | 1.07                | 1.05-1.09     | <0.0001        |
| <b>Congestive heart failure</b>                | 1.37                | 1.36-1.38     | <0.0001        |
| <b>Chronic lung disease</b>                    | 1.14                | 1.13-1.15     | <0.0001        |
| <b>Coagulopathy</b>                            | 1.02                | 1-1.03        | 0.03           |
| <b>Depression</b>                              | 1.04                | 1.03-1.05     | <0.0001        |
| <b>Diabetes mellitus</b>                       | 1.38                | 1.37-1.39     | <0.0001        |
| <b>Drug abuse</b>                              | 1.15                | 1.11-1.2      | <0.0001        |
| <b>Hypertension</b>                            | 1.05                | 1.05-1.06     | <0.0001        |
| <b>Hypothyroidism</b>                          | 0.98                | 0.97-0.99     | <0.0001        |
| <b>Liver disease</b>                           | 0.94                | 0.91-0.96     | <0.0001        |
| <b>Lymphoma</b>                                | 1.19                | 1.15-1.24     | <0.0001        |
| <b>Electrolytes abnormality</b>                | 1.05                | 1.04-1.06     | <0.0001        |
| <b>Metastatic disease</b>                      | 1.16                | 1.1-1.21      | <0.0001        |
| <b>Obesity</b>                                 | 0.93                | 0.92-0.94     | <0.0001        |
| <b>Peripheral arterial disease</b>             | 1.27                | 1.26-1.28     | <0.0001        |
| <b>Psychosis</b>                               | 1.11                | 1.09-1.14     | <0.0001        |
| <b>Renal disease</b>                           | 1.50                | 1.49-1.51     | <0.0001        |
| <b>Tumor without metastasis</b>                | 1.07                | 1.05-1.1      | <0.0001        |
| <b>Underweight</b>                             | 1.03                | 1-1.05        | 0.02           |
| <b>Prior bleeding</b>                          | 1.05                | 1.02-1.07     | <0.0001        |
| <b>Prior ICD</b>                               | 1.16                | 1.14-1.18     | <0.0001        |
| <b>Prior ischemic stroke</b>                   | 1.16                | 1.15-1.18     | <0.0001        |
| <b>Prior Pacemaker</b>                         | 1.06                | 1.04-1.07     | <0.0001        |
| <b>Prior revascularization</b>                 | 1.84                | 1.77-1.91     | <0.0001        |
| <b>Sleep apnea</b>                             | 0.94                | 0.93-0.95     | <0.0001        |
| <b>Prior smoking</b>                           | 0.95                | 0.94-0.95     | <0.0001        |
| <b>Preexisting atrial fibrillation</b>         | 0.99                | 0.98-0.99     | 0.0008         |
| <b>Cardiogenic shock</b>                       | 1.28                | 1.26-1.3      | <0.0001        |
| <b>Drug eluting stent</b>                      | Reference           | Reference     |                |
| <b>Bare metal stent</b>                        | 1.12                | 1.11-1.13     | <0.0001        |
| <b>Number of vessels (reference= 1 vessel)</b> |                     |               |                |
| <b>2 Vessels</b>                               | 1.10                | 1.09-1.11     | <0.0001        |
| <b>3 Vessels</b>                               | 1.16                | 1.14-1.18     | <0.0001        |
| <b>≥4 Vessels</b>                              | 1.17                | 1.12-1.23     | <0.0001        |
| <b>Number of stents (reference= 1 stent)</b>   |                     |               |                |
| <b>2 Stents</b>                                | 1.01                | 1-1.01        | 0.2            |
| <b>3 Stents</b>                                | 1.06                | 1.05-1.07     | <0.0001        |
| <b>≥4 Stents</b>                               | 1.11                | 1.09-1.13     | <0.0001        |

|                                      |           |           |         |
|--------------------------------------|-----------|-----------|---------|
| <b>Chronic total occlusion</b>       | 1.21      | 1.2-1.23  | <0.0001 |
| <b>Bifurcation</b>                   | 0.96      | 0.94-0.98 | <0.0001 |
| <b>Prior coronary artery disease</b> | 0.79      | 0.76-0.82 | <0.0001 |
| <b>Stable CAD</b>                    | Reference | Reference |         |
| <b>Unstable angina</b>               | 1.15      | 1.14-1.16 | <0.0001 |
| <b>Non-ST elevation MI</b>           | 2.01      | 2-2.03    | <0.0001 |
| <b>Inferior ST-elevation MI</b>      | 1.78      | 1.77-1.8  | <0.0001 |
| <b>Anterior ST-elevation MI</b>      | 1.78      | 1.76-1.8  | <0.0001 |

**Supplemental Table 6: Full model for the outcome of repeat revascularization**

| Variable                                       | Hazards ratio | 95% CI      | P Value |
|------------------------------------------------|---------------|-------------|---------|
| <b>Intravascular ultrasound</b>                | 0.893         | 0.887-0.898 | <0.0001 |
| <b>Age</b>                                     | 0.982         | 0.981-0.983 | <0.0001 |
| <b>Black race</b>                              | 1.06          | 1.05-1.07   | <0.0001 |
| <b>Other races</b>                             | 1.07          | 1.06-1.08   | <0.0001 |
| <b>Female sex</b>                              | 0.97          | 0.96-0.98   | <0.0001 |
| <b>AIDS</b>                                    | 0.84          | 0.77-0.92   | 0.0001  |
| <b>Alcohol abuse</b>                           | 0.80          | 0.77-0.83   | <0.0001 |
| <b>Anemia</b>                                  | 1.08          | 1.07-1.09   | <0.0001 |
| <b>Congestive heart failure</b>                | 1.07          | 1.06-1.08   | <0.0001 |
| <b>Chronic lung disease</b>                    | 1.07          | 1.06-1.08   | <0.0001 |
| <b>Coagulopathy</b>                            | 0.91          | 0.89-0.93   | <0.0001 |
| <b>Depression</b>                              | 0.97          | 0.96-0.98   | <0.0001 |
| <b>Diabetes mellitus</b>                       | 1.31          | 1.3-1.32    | <0.0001 |
| <b>Hypertension</b>                            | 1.07          | 1.06-1.08   | <0.0001 |
| <b>Lymphoma</b>                                | 1.08          | 1.04-1.13   | 0.0002  |
| <b>Electrolytes abnormality</b>                | 0.98          | 0.97-0.99   | <0.0001 |
| <b>Obesity</b>                                 | 0.92          | 0.91-0.93   | <0.0001 |
| <b>Peripheral arterial disease</b>             | 1.14          | 1.13-1.15   | <0.0001 |
| <b>Psychosis</b>                               | 0.93          | 0.91-0.95   | <0.0001 |
| <b>Pulmonary hypertension</b>                  | 0.92          | 0.91-0.94   | <0.0001 |
| <b>Renal disease</b>                           | 1.28          | 1.27-1.29   | <0.0001 |
| <b>Underweight</b>                             | 0.90          | 0.87-0.92   | <0.0001 |
| <b>Prior bleeding</b>                          | 0.87          | 0.85-0.89   | <0.0001 |
| <b>Prior cerebral hemorrhage</b>               | 0.76          | 0.66-0.88   | 0.0003  |
| <b>Prior ICD</b>                               | 1.07          | 1.04-1.09   | <0.0001 |
| <b>Prior ischemic stroke</b>                   | 1.02          | 1.01-1.04   | 0.003   |
| <b>Prior Pacemaker</b>                         | 1.05          | 1.03-1.07   | <0.0001 |
| <b>Prior revascularization</b>                 | 1.23          | 1.19-1.28   | <0.0001 |
| <b>Sleep apnea</b>                             | 0.97          | 0.96-0.99   | <0.0001 |
| <b>Prior smoking</b>                           | 0.94          | 0.93-0.95   | <0.0001 |
| <b>Preexisting atrial fibrillation</b>         | 0.88          | 0.87-0.88   | <0.0001 |
| <b>Cardiac arrest</b>                          | 0.82          | 0.8-0.83    | <0.0001 |
| <b>Cardiogenic shock</b>                       | 0.91          | 0.89-0.93   | <0.0001 |
| <b>Drug eluting stent</b>                      | Reference     | reference   |         |
| <b>Bare metal stent</b>                        | 1.09          | 1.08-1.1    | <0.0001 |
| <b>Number of vessels (reference= 1 vessel)</b> |               |             |         |
| <b>2 Vessels</b>                               | 1.02          | 1.01-1.03   | <0.0001 |
| <b>3 Vessels</b>                               | 1.03          | 1-1.05      | 0.02    |
| <b>≥4 Vessels</b>                              | 1.05          | 1-1.1       | 0.05    |
| <b>Number of stents (reference= 1 stent)</b>   |               |             |         |
| <b>2 Stents</b>                                | 1.18          | 1.17-1.19   | <0.0001 |
| <b>3 Stents</b>                                | 1.34          | 1.33-1.36   | <0.0001 |
| <b>≥4 Stents</b>                               | 1.35          | 1.33-1.38   | <0.0001 |

|                                      |           |           |         |
|--------------------------------------|-----------|-----------|---------|
| <b>Chronic total occlusion</b>       | 1.15      | 1.14-1.16 | <0.0001 |
| <b>Bifurcation</b>                   | 0.88      | 0.86-0.9  | <0.0001 |
| <b>Prior coronary artery disease</b> | 1.09      | 1.05-1.13 | <0.0001 |
| <b>Stable CAD</b>                    | Reference | Reference |         |
| <b>Unstable angina</b>               | 1.18      | 1.17-1.19 | <0.0001 |
| <b>Non-ST elevation MI</b>           | 1.02      | 1.02-1.03 | <0.0001 |
| <b>Inferior ST-elevation MI</b>      | 0.89      | 0.88-0.9  | <0.0001 |
| <b>Anterior ST-elevation MI</b>      | 0.83      | 0.82-0.84 | <0.0001 |

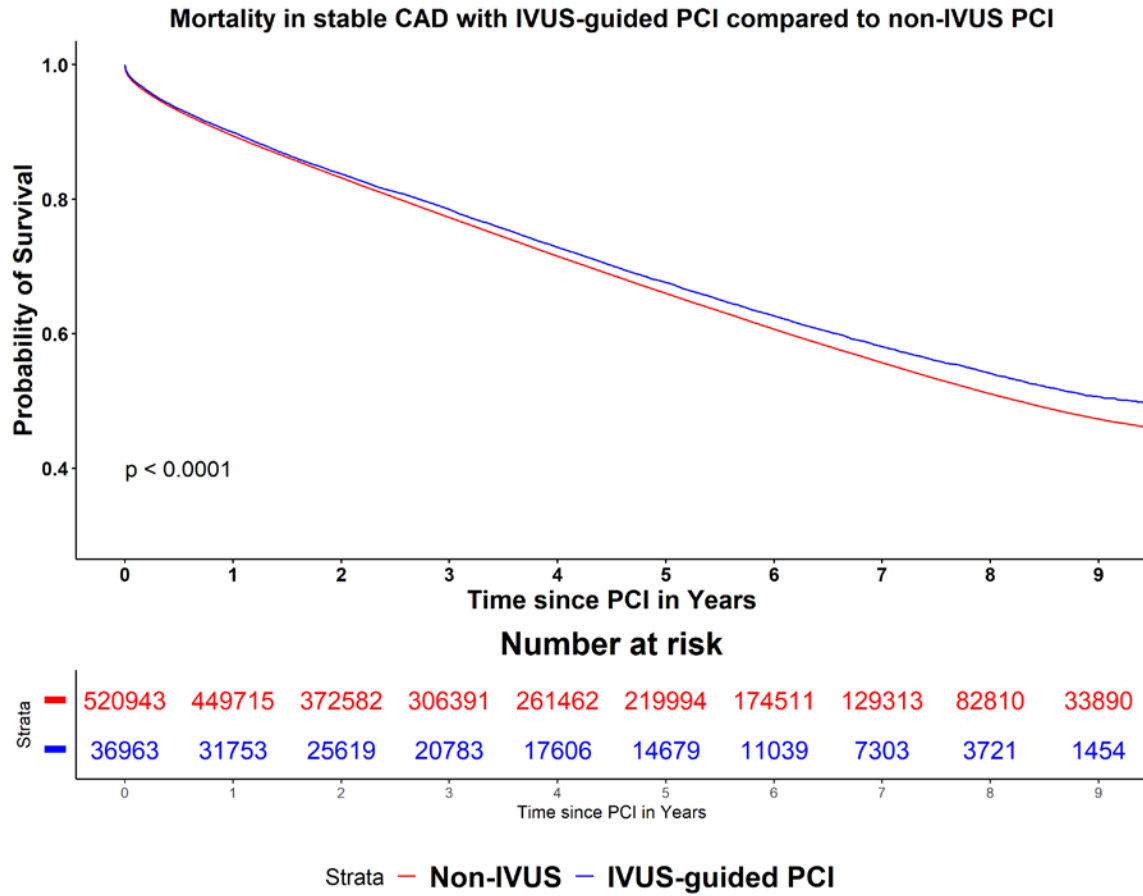

Supplemental Figure A: Kaplan Meier curves for all-cause mortality between PCI with and without intravascular ultrasound in patients presenting with stable coronary artery disease.



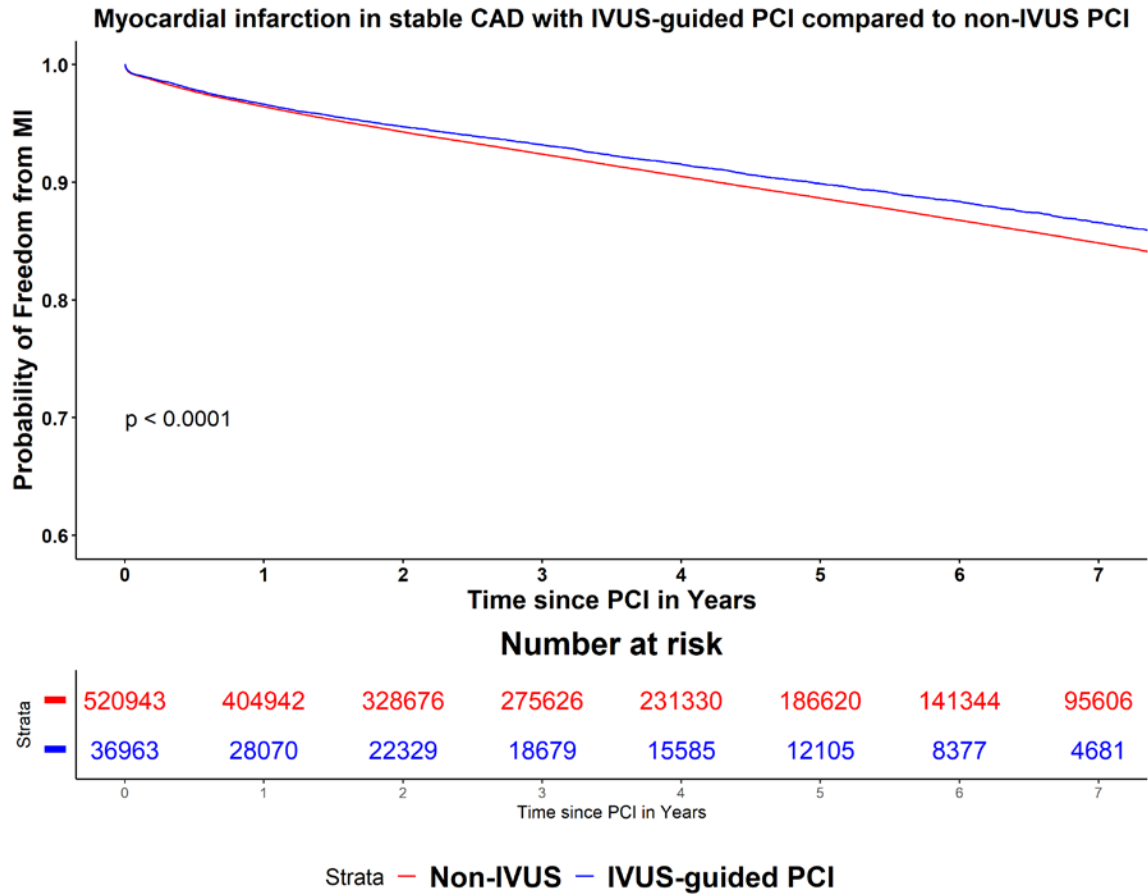

Supplemental Figure B: Kaplan Meier curves for myocardial infarction between PCI with and without intravascular ultrasound in patients presenting with stable coronary artery disease.

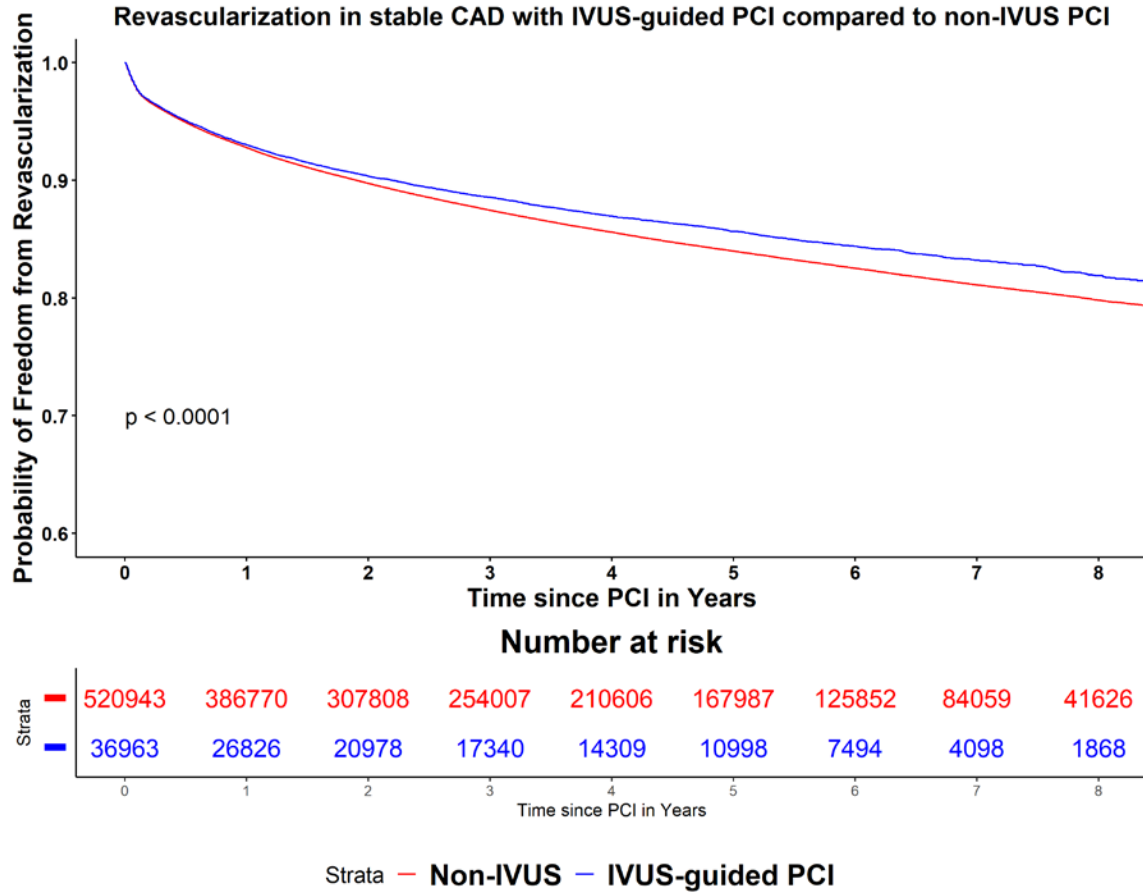

Supplemental Figure C: Kaplan Meier curves for revascularization between PCI with and without intravascular ultrasound in patients presenting with stable coronary artery disease.
